# Supplementary material for: Arbuscular mycorrhizal fungi alter rhizosphere fungal community characteristics of Acorus calamus to improve Cr resistance
Source: PeerJ. 2023 Nov 8;11:e15681. doi: 10.7717/peerj.15681 (PMC10638908; doi:10.7717/peerj.15681)
Supplement: Supplemental Information 2 — Alpha diversity analysis reflects the richness and diversity of microbial communities, including a series of statistical analysis indexes to estimate the species abundance and diversity of ecological communities.The indexes reflecting the Community richness include: Sobs, Chao1, Ace.The indexes reflecting the Community diversity include: Shannon, Simpson. [file peerj-11-15681-s002.xlsx]

## Sheet: Sheet1
Sample	Sobs	Chao1	Ace	Shannon	Simpson
CK1	244	260.276	258.676	3.587	0.065
CK2	239.333	262.749	263.907	3.359	0.143
A1	210.333	222.745	223.544	3.569	0.07
A2	253	275.03	277.9	3.197	0.151
B1	239.333	282.054	262.521	3.466	0.103
B2	257.333	278.171	278.395	3.209	0.137
C1	198.667	217.585	218.276	3.04	0.126
C2	223.333	240.994	236.167	3.793	0.057
D1	185	198.353	200.957	2.852	0.17
D2	219	237.391	232.718	3.274	0.162
